# Supplementary material for: Highly selective biocatalytic synthesis of monoacylglycerides in sponge-like ionic liquids
Source: Royal Society of Chemistry journal article supplement (doi:10.1039/c6gc01969b), 2016-08-25

## ***ELECTRONIC SUPPLEMENTARY INFORMATION.***

### **HIGHLY SELECTIVE BIOCATALYTIC SYNTHESIS OF MONOACYLGLYCERIDES IN SPONGE-LIKE IONIC LIQUIDS**

Pedro Lozano,<sup>\*a</sup> Celia Gomez,<sup>a</sup> Susana Nieto,<sup>a</sup> Gergorio Sanchez-Gomez,<sup>b</sup> Eduardo García-Verdugo<sup>c</sup> and Santiago V. Luis<sup>c</sup>

<sup>a</sup>Departamento de Bioquímica y Biología Molecular B e Inmunología. Facultad de Química. Campus Regional de Excelencia Internacional “Mare Nostrum”. Universidad de Murcia, E-30100 MURCIA. Spain.

<sup>b</sup>Departamento de Química Inorgánica. Facultad de Química. Campus Regional de Excelencia Internacional “Mare Nostrum”. Universidad de Murcia, E-30100 MURCIA. Spain.

<sup>c</sup> Departamento de Química Inorgánica y Orgánica. Universidad Jaume I. Campus del Riu Sec. Avenida Sos Baynant s/n, E-12071, Castellón, Spain

#### **NMR analyses**

##### **Samples preparation of reaction media containing SLILs based on [NTf<sub>2</sub>] anion**

As representative example of SLILs based on [NTf<sub>2</sub>] anion, the resulting acylglyceride products from reaction mixture reported in Table 1, corresponding to the synthesis of monoolein in [C<sub>18</sub>mim][NTf<sub>2</sub>] (entry 10), was selected for the determination of the residual IL content.

The reaction mixture was placed into a 2-mL vial, and then incubated at 60 °C until a fully clear and homogeneous phase was observed. Then, hot water (1.0 mL, 60°C) was added, and the resulting multiphase solution was strongly shaken for 30 min at 60°C, being finally cooled to room temperature. The acylglycerides/water/[C<sub>18</sub>mim][NTf<sub>2</sub>] multiphasic mixture was consecutively centrifuged three times at 15,000 rpm (60 min) and at room temperature (non-controlled), 23 and 15°C, respectively, resulting in three phases, as follows: a top phase of acylglyceride product, an aqueous middle phase and a bottom phase containing the solid IL. Then, an aliquot (80 µL) was taken from the resulting top phase, being dissolved in 0.45 mL acetone-*d*<sub>6</sub> containing 80 µL trifluoroacetic acid (internal standard), and analyzed by 300 MHz <sup>19</sup>F NMR in a Bruker AC 200E spectrometer. As standard reference, a sample (50 mg) of [C<sub>18</sub>tmna][NTf<sub>2</sub>] dissolved in 0.45 mL acetone-*d*<sub>6</sub>, containing 80 µL trifluoroacetic acid, was also analysed to be used as reference

**1. Standard reference** [C<sub>18</sub>mim][NTf<sub>2</sub>]

<sup>19</sup>F-NMR spectrum

300MHz

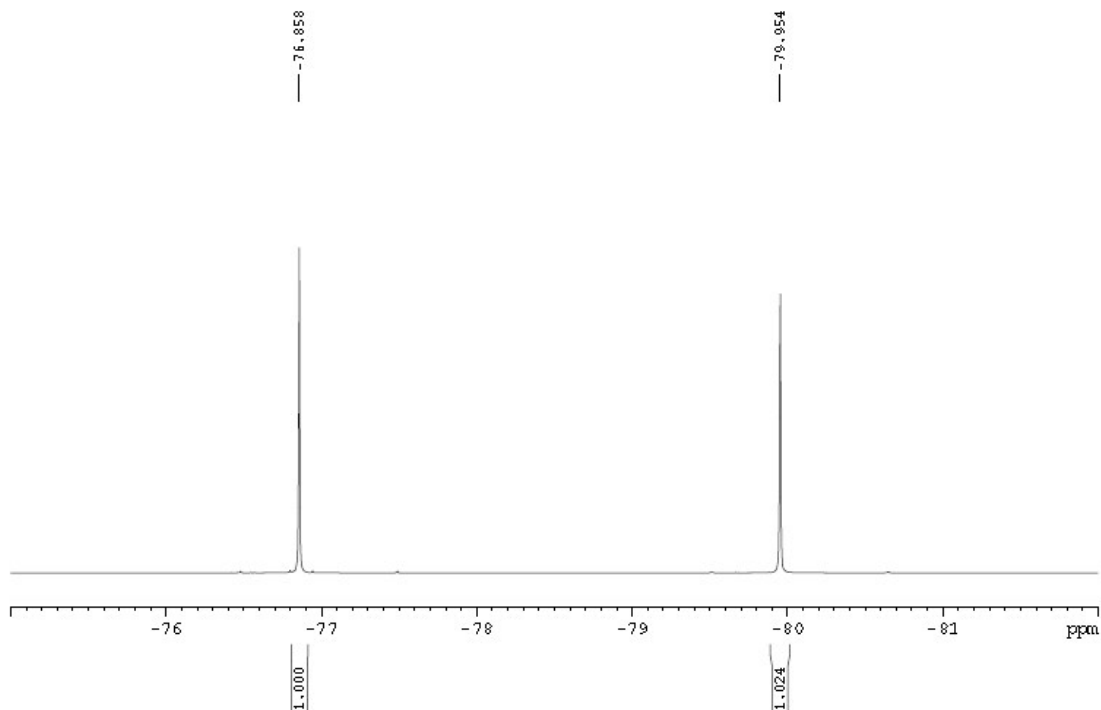

**2. Sample of reaction medium of Entry 10, Table 1(from [C<sub>18</sub>mim][NTf<sub>2</sub>])**

<sup>19</sup>F-NMR spectrum

300MHz

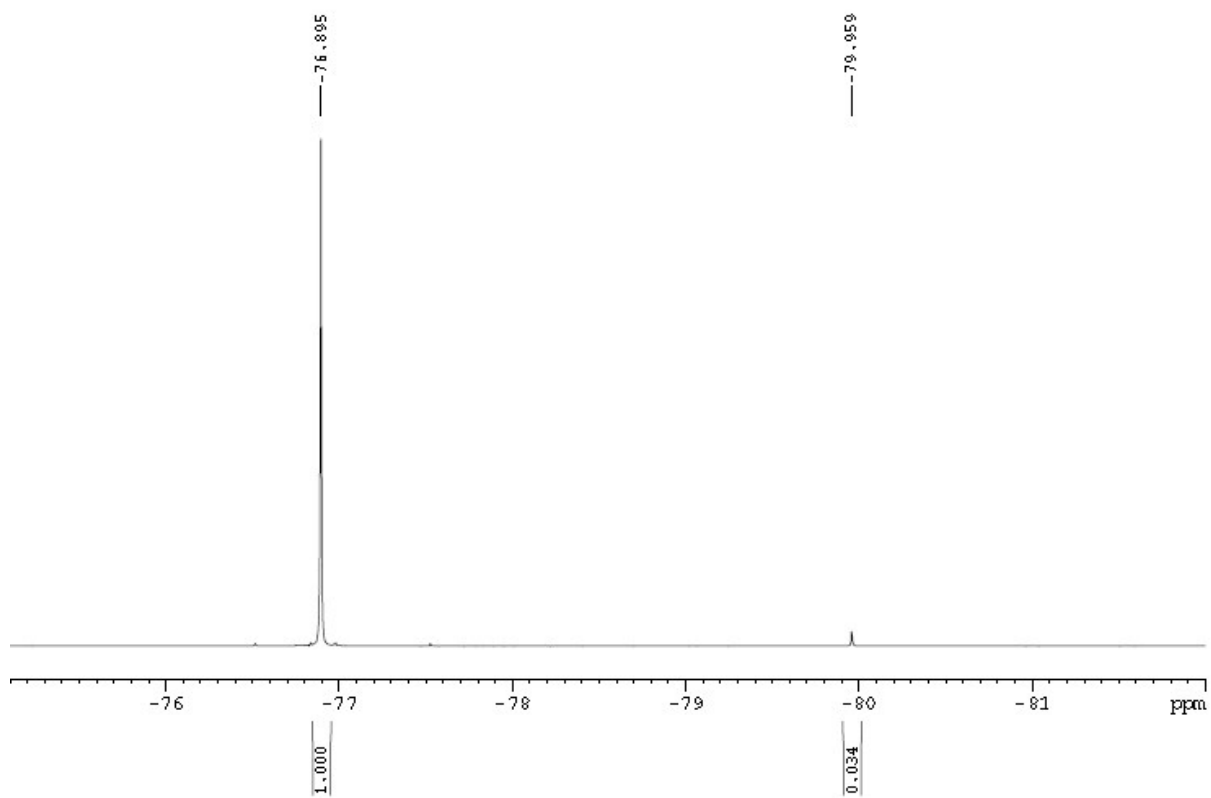

## Samples preparation of reaction media containing SLILs based on [BF<sub>4</sub>] anion

As representative example of SLILs based on [BF<sub>4</sub>] anion, the resulting acylglyceride products from reaction mixtures reported in Table 1, corresponding to the synthesis of monocaprin, monolaurin, monomyristin, monopalmitin and monoolein in [C<sub>12</sub>mim][BF<sub>4</sub>] (entries 12, 13, 14, 15 and 16, respectively), were selected for the determination of the residual IL content.

The reaction mixture was placed into a 2-mL vial, and then incubated at 60°C until a fully clear and homogeneous phase was observed. Then, dodecane (1 mL) was added to each sample, and the resulting fully clear monophasic solutions were strongly shaken for 3 min at room temperature and finally incubated into an ice-bath for 15 min. Each aglylycerides/SLIL/dodecane mixture was centrifuged at 15,000 rpm (15 min) and at 6°C, resulting in the full precipitation of the [C<sub>12</sub>mim][BF<sub>4</sub>]. The top phases were collected, and the residual IL content was analysed by <sup>19</sup>F NMR, as described above by using a [C<sub>12</sub>mim][BF<sub>4</sub>] solution in acetone- $\delta_6$  containing TFA, as standard

### 1. Standard reference [C<sub>12</sub>mim][BF<sub>4</sub>]

<sup>19</sup>F-NMR spectrum

Standard reference: (50 mg) of [C<sub>12</sub>tmna][BF<sub>4</sub>] dissolved in 0.45 mL acetone- $\delta_6$ , containing 40  $\mu$ L trifluoroacetic acid.

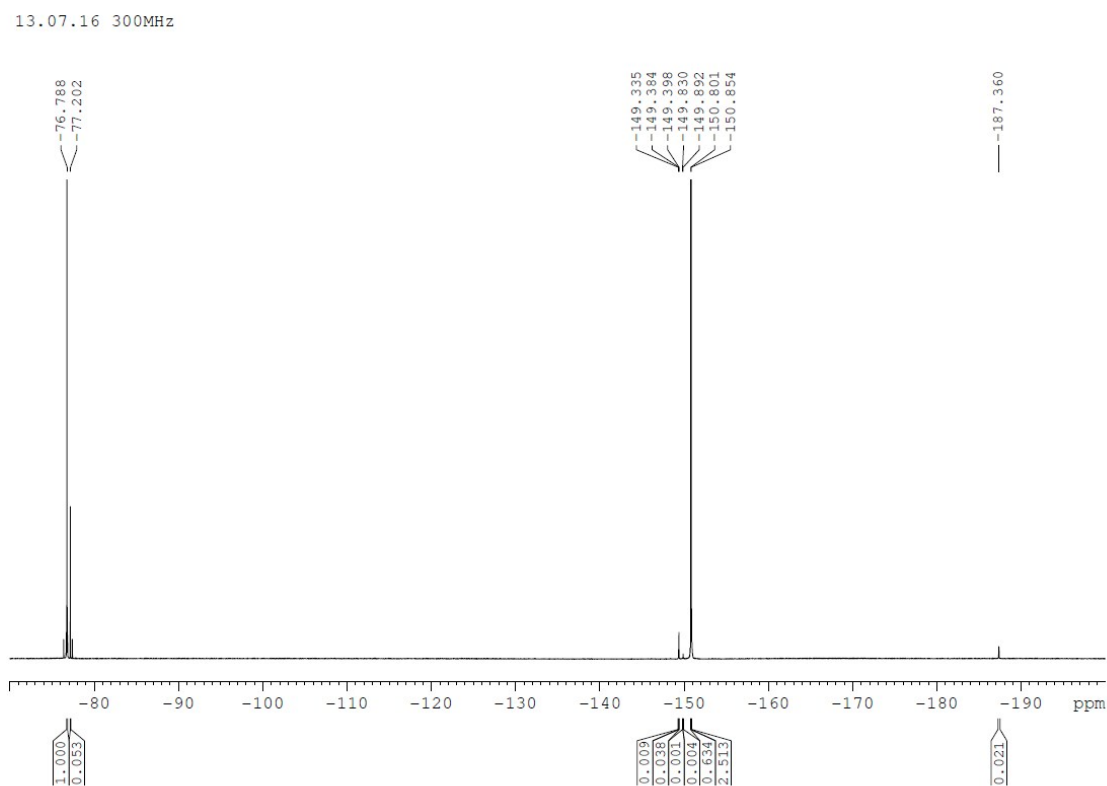

**2. Sample of reaction medium of Entry 12, Table 1(monocaprin/[C<sub>12</sub>mim][BF<sub>4</sub>])**

<sup>19</sup>F-NMR spectrum

p s v 300MHz

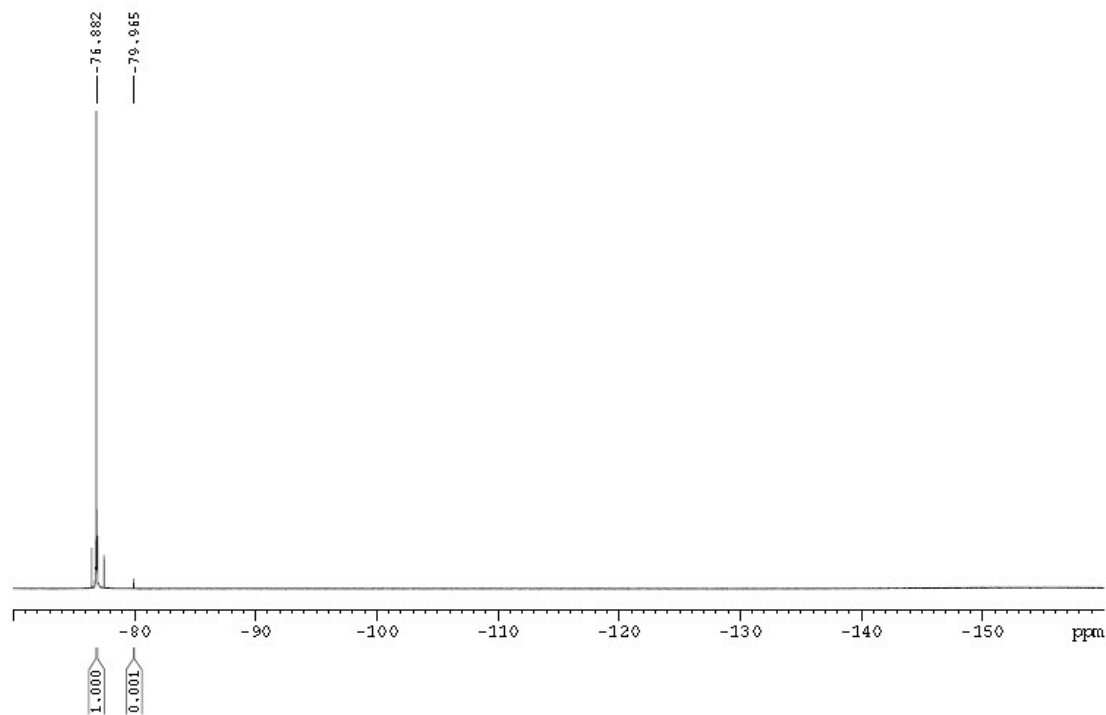

**3. Sample of reaction medium of Entry 13, Table 1(monolaurin/[C<sub>12</sub>mima][BF<sub>4</sub>])**

<sup>19</sup>F-NMR spectrum

L s v 300MHz

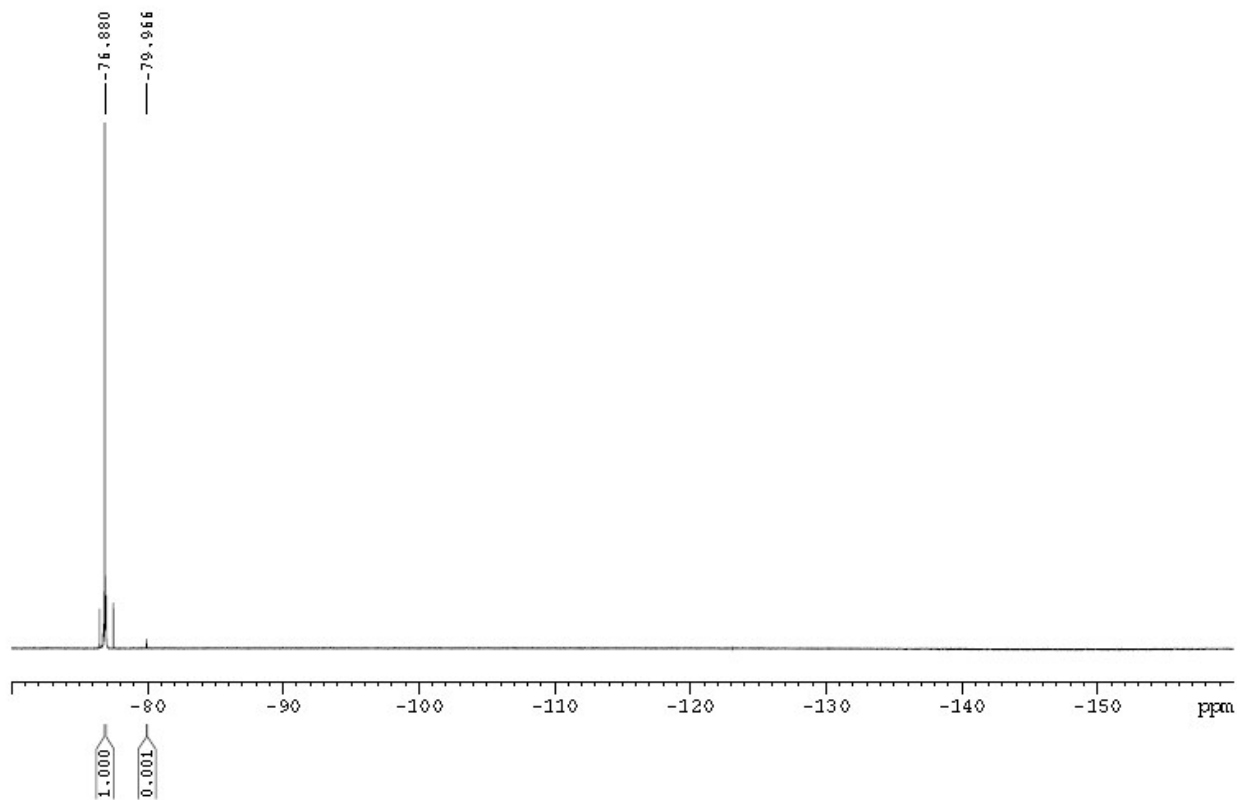

4. Sample of reaction medium of Entry 14, Table 1 (monomyristin/[C<sub>12</sub>mim][BF<sub>4</sub>])

<sup>19</sup>F-NMR spectrum

M S U 300MHz

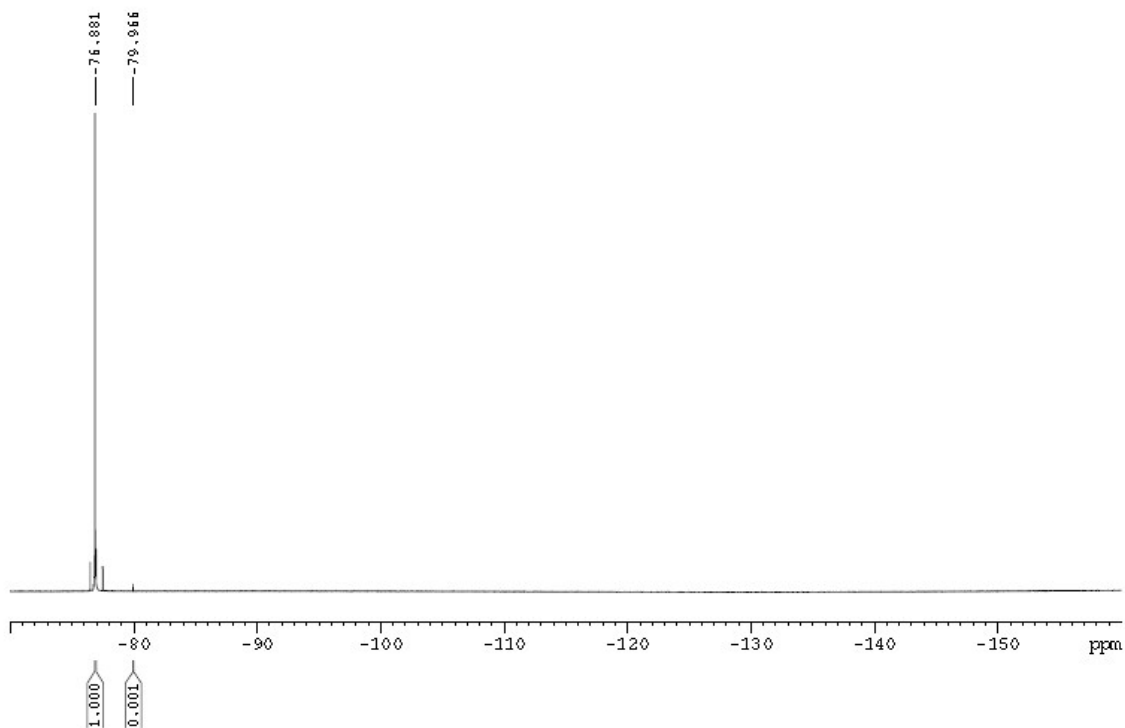

5. Sample of reaction medium of Entry 15, Table 1 (monopalmitin/[C<sub>12</sub>mim][BF<sub>4</sub>])

<sup>19</sup>F-NMR spectrum

F S U 300MHz

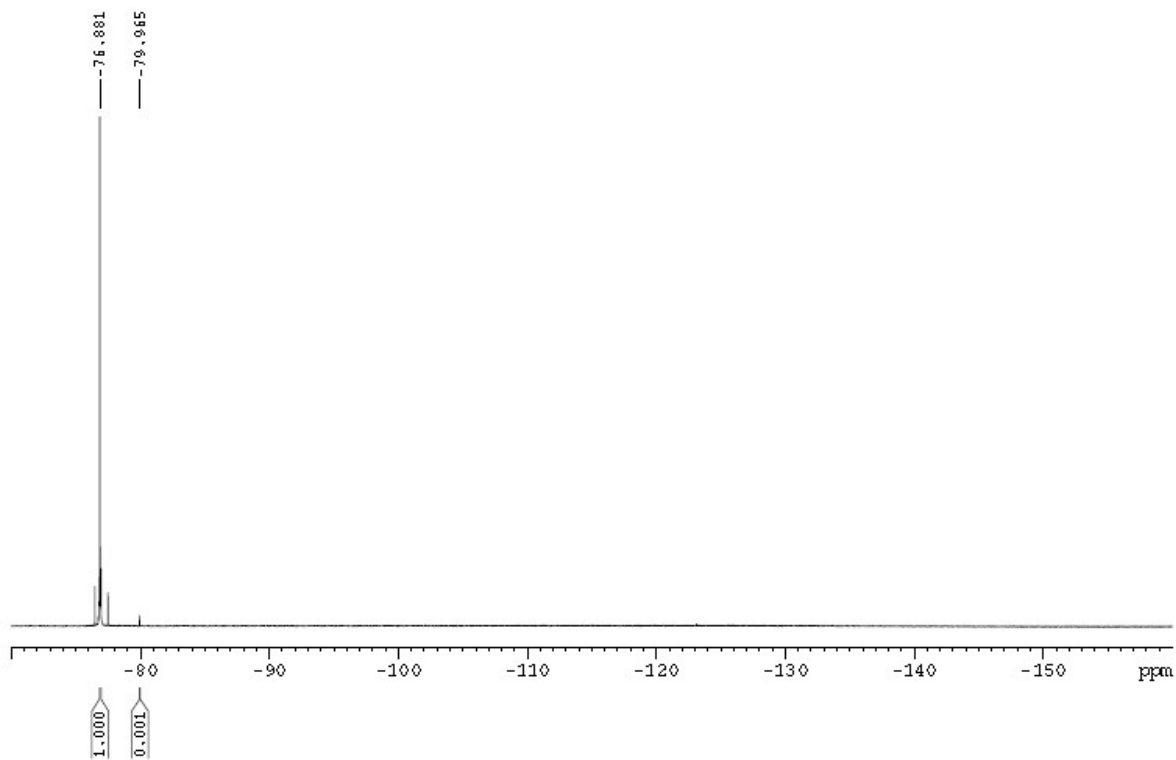

6. Sample of reaction medium of Entry 15, Table 1 (monoolein/[C<sub>12</sub>mim][BF<sub>4</sub>])

<sup>19</sup>F-NMR spectrum

0 80 300 MHz

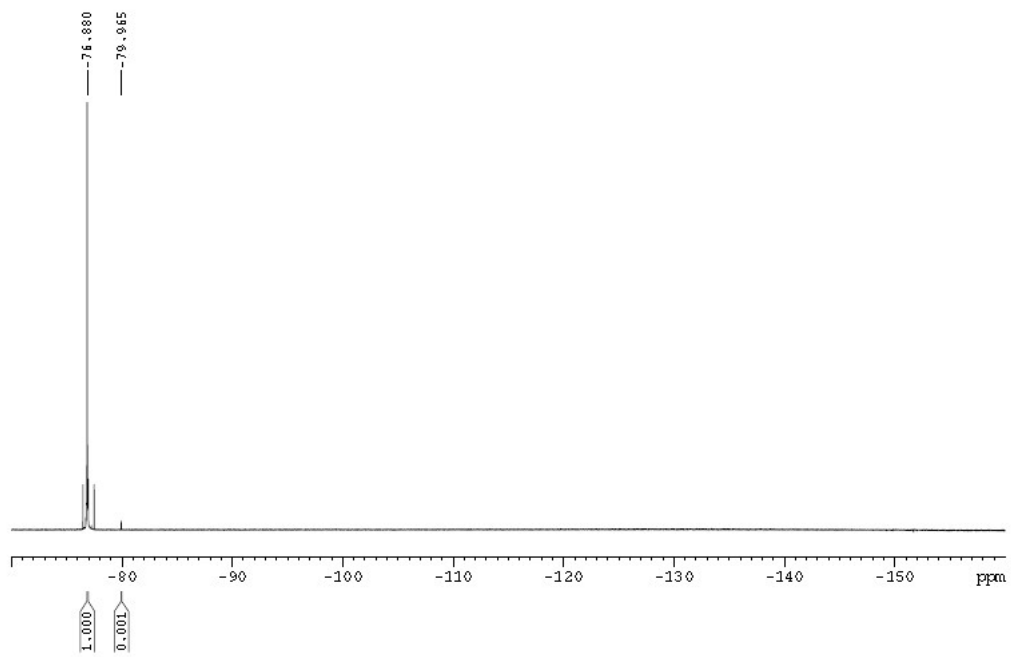

Supplement: c6gc01969b1.pdf [file c6gc01969b1.pdf]
